# Supplementary material for: Cell-selective proteomics reveal novel effectors secreted by an obligate intracellular bacterial pathogen
Source: PubMed Central journal article supplement (PMC11258249; doi:10.1038/s41467-024-50493-9), 2024-07-18
Supplement: 41467_2024_50493_MOESM1_ESM.pdf [file 41467_2024_50493_MOESM1_ESM.pdf]

## **Supplementary Information**

### **Cell-selective proteomics reveal novel effectors secreted by an obligate intracellular bacterial pathogen**

Allen G. Sanderlin<sup>1</sup>, Hannah Kurka Margolis<sup>1</sup>, Abigail F. Meyer<sup>1</sup>, Rebecca L. Lamason<sup>1,\*</sup>

<sup>1</sup>Department of Biology, Massachusetts Institute of Technology, Cambridge, Massachusetts, USA

\*Corresponding author, [rlamason@mit.edu](mailto:rlamason@mit.edu)

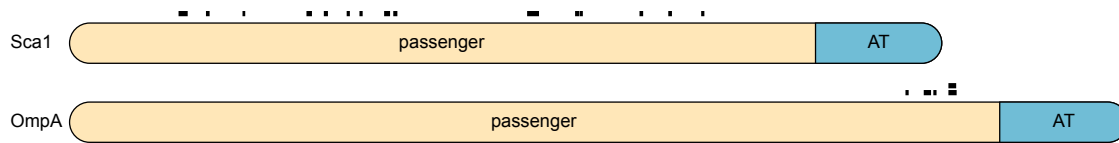

**Supplementary Fig. 1 | Tryptic peptides mapping to autotransporter proteins Sca1 and OmpA.**  
Positions of unique peptides (black boxes) and passenger and autotransporter (AT) domains are indicated.

a

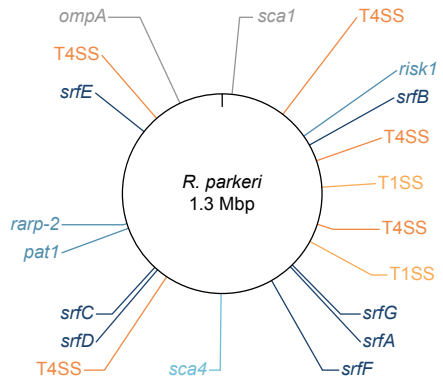

**Supplementary Fig. 2 | Genomic positions and gene neighborhoods of *srf* loci.**

**a** *R. parkeri* genome map displaying loci encoding SrfA–G; autotransporter proteins Sca1 and OmpA; known secreted effectors RARP-2, Pat1, Risk1, and Sca4; and components of the type IV (T4SS: RvhBD) and putative type I (T1SS: TolC, AprDE) secretion systems.

**b** Gene neighborhoods for *srfA–G* (black) across select members of the *Rickettsia* genus. Shared flanking genes are colored if found in at least three of the aligned genomes, and continuous gene neighborhoods for *srfG* and *srfA* and for *srfD* and *srfC* are highlighted for clarity. The putative *srfE* homolog of *R. bellii* (*RBE\_1196*) is located distal to the flanking genes shared by other species and is therefore absent from the alignment. hp, hypothetical protein; pa, *R. parkeri*; ri, *R. rickettsii*; lp, *Rickettsia* endosymbiont of *Ixodes pacificus*; fe, *R. felis*; ty, *R. typhi*; ca, *R. canadensis*; be, *R. bellii*. Scale bar, 1 kbp.

b

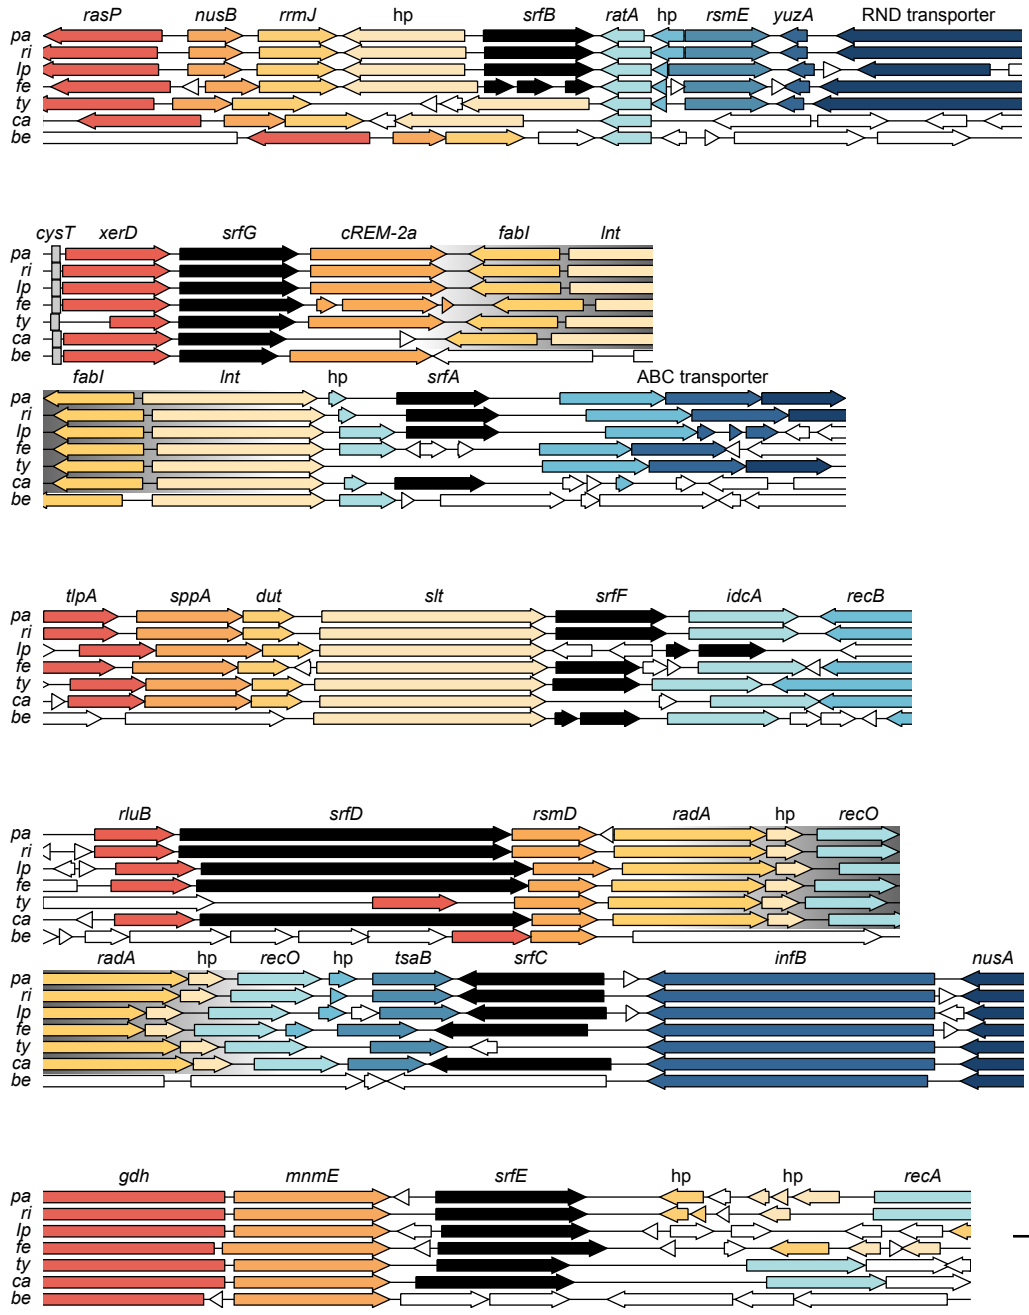

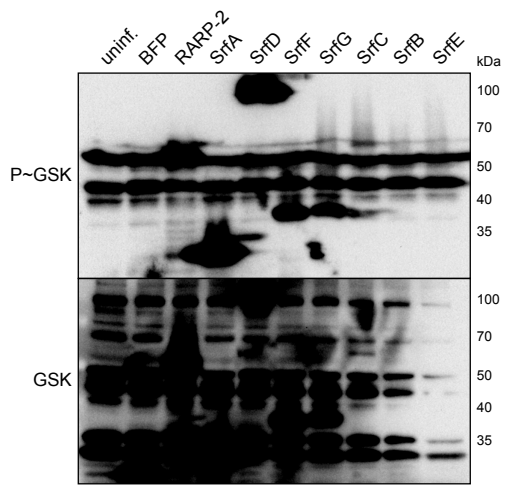

**Supplementary Fig. 3 | GSK-tagged SrfB and SrfE are not obviously expressed by *R. parkeri*.**

Western blots from Fig. 3a with enhanced contrast. SrfB and SrfE (expected 37 and 50 kDa, respectively) were not detected. Source data are provided as a Source Data file.

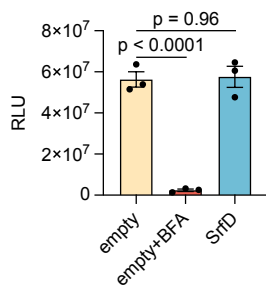

**Supplementary Fig. 4 | SrfD does not impact secretion of *Gaussia* luciferase.**

HEK293T cells stably expressing *Gaussia* luciferase were transiently transfected in triplicate ( $n = 3$ ) with either empty vector or 3xFLAG-tagged SrfD and treated with DMSO or brefeldin A (BFA) prior to measuring luciferase activity of the culture supernatants. Relative light units (RLU) from a representative experiment were used to calculate the means  $\pm$  SD and p-values (one-way ANOVA with post hoc Dunnett's test,  $F = 74.15$ ,  $q = 10.42$  and  $0.24$ ,  $df = 6$ ). Results are representative of two independent experiments. Source data are provided as a Source Data file.

| Strain or plasmid                 | Genotype or feature                                 | Reference or source           |
|-----------------------------------|-----------------------------------------------------|-------------------------------|
| <b><i>R. parkeri</i> strains</b>  |                                                     |                               |
| <i>R. parkeri</i> str. Portsmouth | Parental <i>R. parkeri</i> strain                   | Chris Paddock                 |
| WT                                | pRAM18dSGA[MCS]                                     | This study                    |
| MetRS*                            | pRL0128                                             | This study                    |
| GSK-BFP                           | pRL0284                                             | 1                             |
| GSK-RARP-2                        | pRL0285                                             | 1                             |
| GSK-SrfA                          | pRL0368                                             | This study                    |
| GSK-SrfB                          | pRL0369                                             | This study                    |
| GSK-SrfC                          | pRL0370                                             | This study                    |
| GSK-SrfD                          | pRL0371                                             | This study                    |
| GSK-SrfE                          | pRL0372                                             | This study                    |
| GSK-SrfF                          | pRL0373                                             | This study                    |
| GSK-SrfG                          | pRL0374                                             | This study                    |
| <b>Plasmids</b>                   |                                                     |                               |
| pRAM18dSGA[MCS]                   | <i>Rickettsia</i> shuttle vector                    | Ulrike Munderloh              |
| pRL0128                           | MetRS*                                              | This study                    |
| pRL0284                           | GSK-tagged TagBFP                                   | 1                             |
| pRL0285                           | GSK-tagged RARP-2                                   | 1                             |
| pRL0368                           | GSK-tagged SrfA                                     | This study                    |
| pRL0369                           | GSK-tagged SrfB                                     | This study                    |
| pRL0370                           | GSK-tagged SrfC                                     | This study                    |
| pRL0371                           | GSK-tagged SrfD                                     | This study                    |
| pRL0372                           | GSK-tagged SrfE                                     | This study                    |
| pRL0373                           | GSK-tagged SrfF                                     | This study                    |
| pRL0374                           | GSK-tagged SrfG                                     | This study                    |
| pRL0375                           | GST-tagged SrfC                                     | This study                    |
| pRL0376                           | GST-tagged SrfD( $\Delta$ 766–957)                  | This study                    |
| pRL0377                           | GST-tagged SrfF                                     | This study                    |
| pRL0378                           | 6xHis-SUMO-TwinStrep-tagged SrfD( $\Delta$ 766–957) | This study                    |
| pRL0379                           | 6xHis-SUMO-TwinStrep-tagged SrfF                    | This study                    |
| pRL0430                           | 6xHis-MBP-tagged SrfE(277–403)                      | Supratim Dey & Karla Satchell |
| pRL0381                           | empty vector control                                | This study                    |
| pRL0382                           | 3xFLAG-tagged SrfA                                  | This study                    |
| pRL0383                           | 3xFLAG-tagged SrfB                                  | This study                    |
| pRL0384                           | 3xFLAG-tagged SrfC                                  | This study                    |
| pRL0385                           | 3xFLAG-tagged SrfD                                  | This study                    |
| pRL0386                           | 3xFLAG-tagged SrfE                                  | This study                    |
| pRL0387                           | 3xFLAG-tagged SrfF                                  | This study                    |
| pRL0388                           | 3xFLAG-tagged SrfG                                  | This study                    |
| FCW21B-BiP-mNeonGreen-KDEL        | BiP(1–18)-mNeonGreen-KDEL                           | 2                             |
| pRL0389                           | <i>Gaussia</i> -Dura luciferase                     | This study                    |
| pRL0390                           | 3xFLAG-tagged SrfD $\Delta$ PPR1                    | This study                    |
| pRL0391                           | 3xFLAG-tagged SrfD $\Delta$ CC1                     | This study                    |
| pRL0392                           | 3xFLAG-tagged SrfD $\Delta$ PPR2                    | This study                    |
| pRL0393                           | 3xFLAG-tagged SrfD $\Delta$ TM                      | This study                    |
| pRL0394                           | 3xFLAG-tagged SrfD $\Delta$ CC2                     | This study                    |

**Supplementary Table 1. Strains and plasmids used in this study.**

#### Supplementary References

1. Sanderlin, A. G., Hanna, R. E. & Lamason, R. L. The ankyrin repeat protein RARP-1 is a periplasmic factor that supports *Rickettsia parkeri* growth and host cell invasion. *J. Bacteriol.* **204**, e00182-22 (2022).
2. Acevedo-Sánchez, Y., Woida, P. J., Kraemer, S. & Lamason, R. L. An obligate intracellular bacterial pathogen forms a direct, interkingdom membrane contact site. Preprint at <https://doi.org/10.1101/2023.06.05.543771> (2023).
