# Supplementary material for: Cell-selective proteomics reveal novel effectors secreted by an obligate intracellular bacterial pathogen
Source: PubMed Central journal article supplement (PMC11258249; doi:10.1038/s41467-024-50493-9), 2024-07-18
Supplement: 41467_2024_50493_MOESM3_ESM.pdf [file 41467_2024_50493_MOESM3_ESM.pdf]

## **Description of Additional Supplementary Files**

File Name: Supplementary Data 1

Description: BONCAT pull-down mass spectrometry results.

File Name: Supplementary Data 2

Description: SrfD co-immunoprecipitation mass spectrometry results.
